# Supplementary material for: Postnatal checks and primary care consultations in the year following childbirth: an observational cohort study of 309 573 women in the UK, 2006–2016
Source: HighWire-hosted journal article supplement (doi:10.1136/bmjopen-2020-036835), 2020-11-01
Supplement: bmjopen-2020-036835supp001_data_supplement.pdf [file bmjopen-2020-036835supp001_data_supplement.pdf]

Holly Smith, 29/06/20  
Postnatal\_check\_supplementary

## Supplementary materials

*Likelihood of having a postnatal check using a more sensitive outcome definition (any consultation between weeks 5-10)*

| Characteristic                 | All women<br>n | Consultation in<br>weeks 5-10<br>n (%) | Consultation in weeks 5-10  |                                                |
|--------------------------------|----------------|----------------------------------------|-----------------------------|------------------------------------------------|
|                                |                |                                        | Unadjusted:<br>IRR (95% CI) | Age & deprivation<br>adjusted:<br>IRR (95% CI) |
| <b>Overall</b>                 | 309,573        | 243,516 (78.7)                         |                             |                                                |
| <b>Maternal age (years)</b>    |                |                                        |                             |                                                |
| 15-19                          | 9,568          | 6,977 (72.9)                           | 0.94 (0.91-0.96)            | 0.94 (0.92-0.97)                               |
| 20-24                          | 43,116         | 32,429 (75.2)                          | 0.96 (0.95-0.98)            | 0.97 (0.95-0.98)                               |
| 25-29                          | 77,698         | 60,597 (78.0)                          | 0.99 (0.98-1.00)            | 0.99 (0.98-1.00)                               |
| 30-34                          | 98,269         | 78,671 (80.1)                          | 1                           | 1                                              |
| 35-39                          | 64,171         | 51,504 (80.3)                          | 1.00 (0.98-1.01)            | 1.00 (0.98-1.01)                               |
| 40-44                          | 15,908         | 12,674 (79.7)                          | 0.99 (0.97-1.01)            | 0.99 (0.97-1.01)                               |
| 45-49                          | 843            | 664 (78.8)                             | 0.98 (0.90-1.06)            | 0.97 (0.90-1.06)                               |
| <b>Townsend Score quintile</b> |                |                                        |                             |                                                |
| 1-least deprived               | 58,583         | 48,142 (82.2)                          | 1                           | 1                                              |
| 2                              | 53,656         | 43,336 (80.8)                          | 1.00 (0.98-1.01)            | 1.00 (0.98-1.01)                               |
| 3                              | 62,023         | 49,169 (79.3)                          | 0.99 (0.97-1.00)            | 0.99 (0.98-1.00)                               |
| 4                              | 58,506         | 45,574 (77.9)                          | 0.98 (0.96-0.99)            | 0.98 (0.97-1.00)                               |
| 5-most deprived                | 44,346         | 32,729 (73.8)                          | 0.95 (0.93-0.96)            | 0.95 (0.94-0.97)                               |
| Missing                        | 32,459         | 24,566 (75.7)                          | Excluded                    | Excluded                                       |
| <b>Mode of delivery</b>        |                |                                        |                             |                                                |
| Vaginal delivery               | 75,506         | 63,533 (86.8)                          | 1                           | 1                                              |
| Caesarean                      | 23,426         | 20,074 (85.7)                          | 1.03 (1.01-1.04)            | 1.02 (1.01-1.04)                               |
| Unknown                        | 210,641        | 159,533 (75.7)                         | 0.96 (0.94-0.98)            | 0.96 (0.94-0.97)                               |
| <b>Parity</b>                  |                |                                        |                             |                                                |
| First                          | 149,639        | 118,998 (79.5)                         | 1                           | 1                                              |
| Second                         | 69,355         | 53,969 (77.8)                          | 0.97 (0.96-0.98)            | 0.97 (0.96-0.98)                               |
| Third or higher                | 20,113         | 15,258 (75.9)                          | 0.95 (0.93-0.96)            | 0.94 (0.92-0.95)                               |
| Unknown                        | 70,466         | 55,291 (78.5)                          | 0.96 (0.95-0.97)            | 0.95 (0.94-0.96)                               |
| <b>Smoking status</b>          |                |                                        |                             |                                                |
| Current smoker                 | 34,634         | 27,236 (78.6)                          | 0.99 (0.98-1.01)            | 1.01 (0.99-1.02)                               |
| Past smoker**                  | 85,592         | 66,542 (77.7)                          | 0.97 (0.96-0.98)            | 0.97 (0.96-0.98)                               |
| Non-smoker                     | 143,349        | 115,019 (80.2)                         | 1                           | 1                                              |
| Unknown                        | 45,998         | 34,719 (75.5)                          | 0.93 (0.92-0.94)            | 0.93 (0.92-0.94)                               |
| <b>Year group</b>              |                |                                        |                             |                                                |
| 2006-2007                      | 63,793         | 50,496 (79.2)                          | 1                           | 1                                              |
| 2008-2009                      | 66,319         | 52,571 (79.3)                          | 1.00 (0.98-1.01)            | 1.00 (0.98-1.01)                               |
| 2010-2011                      | 66,478         | 52,819 (79.5)                          | 1.00 (0.99-1.02)            | 1.01 (0.99-1.02)                               |
| 2012-2013                      | 63,180         | 49,788 (78.8)                          | 1.00 (0.99-1.02)            | 1.00 (0.99-1.02)                               |
| 2014-2015                      | 49,803         | 37,842 (76.0)                          | 0.97 (0.96-0.99)            | 0.97 (0.96-0.99)                               |

\* Abbreviations: IRR – incidence rate ratio, CI – confidence interval.

\*\*Practice and woman are included as random effects terms in all models

\*\*\*Models exclude women with missing Townsend score

Holly Smith, 29/06/20  
Postnatal\_check\_supplementary

*Number of women who had a consultation in weeks 0-4 and/or weeks 5-10, % of cohort*

| Consultation in week 0-4 (down)/<br>Consultation in weeks 5-10 (across) | Yes             | No             | Total           |
|-------------------------------------------------------------------------|-----------------|----------------|-----------------|
| Yes                                                                     | 89,605 (28.9%)  | 18,723 (6.0%)  | 108,328 (35.0%) |
| No                                                                      | 153,911 (49.7%) | 47,334 (15.3%) | 201,245 (65.0%) |
| Total                                                                   | 243,516 (78.7%) | 66,057 (21.3%) | 309,573         |
